# Supplementary material for: Interaction potentials from arbitrary multi-particle trajectory data
Source: Royal Society of Chemistry journal article supplement (doi:10.1039/c5sm01233c), 2015-01-01
Supplement: c5sm01233c1.pdf [file c5sm01233c1.pdf]

## Supplementary Materials:

### Interaction Potentials from Arbitrary Multi-Particle Trajectory Data

Ian C. Jenkins, John C. Crocker and Talid Sinno<sup>1</sup>

*Department of Chemical and Biomolecular Engineering,  
University of Pennsylvania, Philadelphia, Pennsylvania 19104, USA*

#### Generation of the Mobility Tensor

The terms of the mobility tensor,  $\mathbf{D}$ , are generated using the equations provided by Schmitz and Felderhof<sup>1</sup>. This approach generates a solution for  $\mathbf{D}$  in the form of a series expansion, which has been solved for up to 12<sup>th</sup> order terms. The expression used for the self-interaction terms in the mobility tensor is given by

$$\mathbf{D}_{ii} = k_B T \left( 4\pi\eta A_0^S \right)^{-1} \mathbf{I}, \quad (1)$$

where  $\eta$  is the viscosity of the fluid and  $A_0^S$  is a scattering coefficient. The two-particle interaction terms are generated using the expression

$$D_{ij,\alpha\beta}(\mathbf{r}_{ij}) = k_B T \left( \alpha(R_{ij}) \hat{R}_{ij,\alpha} \hat{R}_{ij,\beta} + \beta(R_{ij}) \left( \delta_{\alpha\beta} - \hat{R}_{ij,\alpha} \hat{R}_{ij,\beta} \right) \right), \quad (2)$$

where  $\mathbf{r}_{ij}$  is the distance vector between a pair of particles,  $\mathbf{r}_{ij} = \mathbf{r}_i - \mathbf{r}_j$ , and  $\hat{R}_{ij,\alpha}$  is a normalized directional component of  $\mathbf{r}_{ij}$  such that  $\hat{R}_{ij,\alpha} = r_{ij,\alpha} / r_{ij}$ . Values for the parameters  $\alpha$  and  $\beta$  are found using

---

<sup>1</sup> Corresponding author: [talid@seas.upenn.edu](mailto:talid@seas.upenn.edu), Tel: (215) 898-2511

$$\begin{aligned}
4\pi\eta\alpha(\mathbf{r}_{ij}) &= \frac{1}{2}r_{ij}^{-1} - \frac{1}{15}S_i r_{ij}^{-3} + A_{1,i}^S A_{1,j}^S r_{ij}^{-7} \\
&+ \left[ A_{1,i}^S \left( -6B_{1,j}^S + \frac{18}{5}A_{2,j}^S + \frac{3}{5}\hat{B}_{2,j}^P \right) - \frac{2}{5}S_i A_{1,i}^S A_{1,j}^S \right] r_{ij}^{-9} \\
&+ \left\{ A_{1,i}^S \left( -\frac{48}{5}B_{2,j}^S + \frac{40}{7}A_{3,j}^S + \frac{12}{7}B_{3,j}^P \right) - B_{1,i}^S \left( -5B_{1,j}^S + \frac{68}{5}A_{2,j}^S + \frac{3}{5}\hat{B}_{2,j}^P \right) \right. \\
&+ A_{2,i}^S \left( \frac{21}{5}A_{2,j}^S + \frac{6}{5}B_{2,j}^P \right) - \frac{4}{5}S_i \left[ A_{1,i}^S \left( -B_{1,j}^S + \frac{3}{2}A_{2,j}^S \right) \right. \\
&\left. \left. + \left( -\frac{3}{2}B_{1,i}^S + \frac{9}{10}A_{2,i}^S + \frac{3}{20}\hat{B}_{2,i}^P \right) A_{1,j}^S \right] + \frac{1}{450}S_i S_j A_{1,i}^S A_{1,j}^S \right\} r_{ij}^{-11} + [i \leftrightarrow j] + O(R_{ij}^{-13})
\end{aligned} \tag{3}$$

$$\begin{aligned}
4\pi\eta\beta(\mathbf{r}_{ij}) &= \frac{1}{4}r_{ij}^{-1} + \frac{1}{30}S_i r_{ij}^{-3} - \left\{ B_{1,i}^S \left( -\frac{1}{6}B_{1,j}^S + \frac{4}{15}A_{2,j}^S + \frac{2}{3}A_{2,j}^T + \frac{1}{10}\hat{B}_{2,j}^P \right) \right. \\
&+ A_{2,i}^S \left( \frac{61}{480}A_{2,j}^S + \frac{5}{12}A_{2,j}^T + \frac{3}{40}\hat{B}_{2,j}^P \right) - \frac{2}{3}A_{2,i}^T A_{2,j}^T - \frac{1}{15}S_i \\
&\times \left( -B_{1,i}^S + \frac{4}{5}A_{2,i}^S + 2A_{2,i}^T + \frac{3}{10}\hat{B}_{2,i}^P \right) A_{1,j}^S \\
&\left. + \frac{1}{150}S_i S_j A_{1,i}^S A_{1,j}^S \right\} r_{ij}^{-11} + [i \leftrightarrow j] + O(R_{ij}^{-13})
\end{aligned} \tag{4}$$

where the various  $A_{m,i}^\alpha$  and  $B_{m,i}^\alpha$  terms are scattering coefficients and  $S_i$  is given by

$$S_i = 3 \frac{A_{2,j}^P}{A_{0,i}^S}. \tag{5}$$

The notation  $[i \leftrightarrow j]$  indicates that the equation should be repeated once with all  $i$  and  $j$  indices swapped<sup>2</sup>.

## REFERENCES

- <sup>1</sup> R. Schmitz and B. U. Felderhof, *Physica A* **116**, 163 (1982).
- <sup>2</sup> P. Reuland, B. U. Felderhof, and R. B. Jones, *Physica A* **93**, 465 (1978).
